# Supplementary material
Source: Research Square preprint supplement (doi:10.21203/rs.3.rs-9370549/v1)
Supplement: Supplementary file 1 [file 9983a6b950c580145f752c07.docx]

## Online Resource 1: Worked example

Let the TAJ be in right-to-left order (i.e. the printed form is ). We trace the TAJ-FC computation step by step.

|  |  |  | after Mul | Note |
| --- | --- | --- | --- | --- |
| 0 | 0 | 1 |  |  |
| 1 | 7 | 1 |  |  |
| 2 | 6 | 3 |  | ; back to identity |
| 3 | 5 | 2 |  |  |
| 4 | 4 | 5 |  |  |
| 5 | 3 | 3 |  |  |
| 6 | 2 | 4 |  |  |
| 7 | 1 | 1 |  |  |
| 8 | 0 | 1 |  | ; final state |

Partial fold: . Inverse: (a reflection is its own inverse). TAJ-FC: .

The receiver, given TAJ and TAJ-FC , places the digit at position  and folds the ten-digit sequence; the result is , confirming validity.

Now suppose positions and (right-to-left) are transposed, changing the printed TAJ from to . Recomputing the partial fold with the altered input yields and therefore TAJ-FC , triggering the hard stop.

## Online Resource 2: Reference pseudocode

The two listings below translate the algebraic definitions into executable form. The group operations reduce to modular- arithmetic plus a single XOR; the position-dependent permutation uses two constant vectors , and modular- arithmetic.

#### Listing 1: Primitive operations on and the cycle-conjugate permutation .

constant rho := [0, 1, 5, 8, 9, 4, 2, 7, 3, 6]
constant rho_inv := [0, 1, 6, 8, 5, 2, 9, 7, 3, 4]

function Mul((a,b), (c,d)):
 sign := +1 if b = 0, else -1
 return ( (a + sign * c) mod 5, b XOR d )

function Inv((a,b)):
 if b = 0: return ( (-a) mod 5, 0 )
 else: return ( a, 1 )

function Phi(d): -- digit -> state
 if d < 5: return (d, 0)
 else: return (d - 5, 1)

function PhiInv((a,b)): -- state -> digit
 if b = 0: return a
 else: return a + 5

function Pi(d, i): -- position permutation
 x := rho_inv[d]
 if x < 8:
 y := (x + i) mod 8
 else if i is even:
 y := x
 else:
 y := 17 - x
 return rho[y]

#### Listing 2: TAJ-FC computation and vTAJ validation.

function ComputeTAJFC(t[0..8]): -- t[0] = rightmost digit
 S := (0, 0) -- identity
 for i from 0 to 8:
 S := Mul(S, Phi(Pi(t[i], i + 1)))
 return PhiInv(Inv(S))

function ValidateVTAJ(t[0..8], k): -- k = received TAJ-FC
 S := (0, 0)
 S := Mul(S, Phi(Pi(k, 0))) -- position 0: TAJ-FC
 for i from 0 to 8:
 S := Mul(S, Phi(Pi(t[i], i + 1)))
 return S = (0, 0)
